# Supplementary material for: AMPK/MFF Activation: Role in Mitochondrial Fission and Mitophagy in Dry Eye
Source: PubMed Central journal article supplement — Invest Ophthalmol Vis Sci. 2022 Nov 14;63(12):18. doi: 10.1167/iovs.63.12.18 (PMC9669805; doi:10.1167/iovs.63.12.18), 2022-11-14
Supplement: iovs-63-12-18_s001.pdf [file iovs-63-12-18_s001.pdf]

**Table1. Sequences of human primers used for RT-PCR**

| Gene          | Forward sequence(5'-3')      | Reverse sequence(5'-3')     |
|---------------|------------------------------|-----------------------------|
| GAPDH         | ATGTTTCGTCATGGGTGTGA<br>A    | GGTGCTAAGCAGTTGGTGG<br>T    |
| NLRP3         | CGTGAGTCCCATTAAAGATG<br>GAGT | CCCGACAGTGGATATAGAAC<br>AGA |
| IL17A         | TGTCACTGCTACTGCTGCT<br>GAG   | GGTGAGGTGGATCGGTTGT<br>AGT  |
| TNF- $\alpha$ | CTCAGCAAGGACAGCAGA<br>GGAC   | TGGAGCCGTGGGTCAGTAT<br>GT   |
| Beclin1       | TGTGTTGCTGCTCCATGCT<br>CTG   | GCCACTGCCTCCTGTGTCTT<br>CA  |
| P62           | GAGCCTCATCTCCTCGGTG<br>T     | TTCTCAAGCCCCATGTTGCA<br>C   |

**Table2. Sequences of mouse primers used for RT-PCR**

| Gene    | Forward sequence(5'-3')    | Reverse sequence(5'-3')     |
|---------|----------------------------|-----------------------------|
| GAPDH   | TGTCCGTCGTGGATCTGA<br>C    | CCTGCTTCACCACCTTCTT<br>G    |
| ATG5    | TGTGCTTCGAGATGTGTG<br>GTT  | GTCAAATAGCTGACTCTTG<br>GCAA |
| Beclin1 | TAAGGCGTCCAGCAGCA<br>CCAT  | AGAGACACCATCCTGGCGA<br>GTT  |
| P62     | CCAGCACAGGCACAGAA<br>GACAA | CCCACCGACTCCAAGGCTA<br>TCT  |

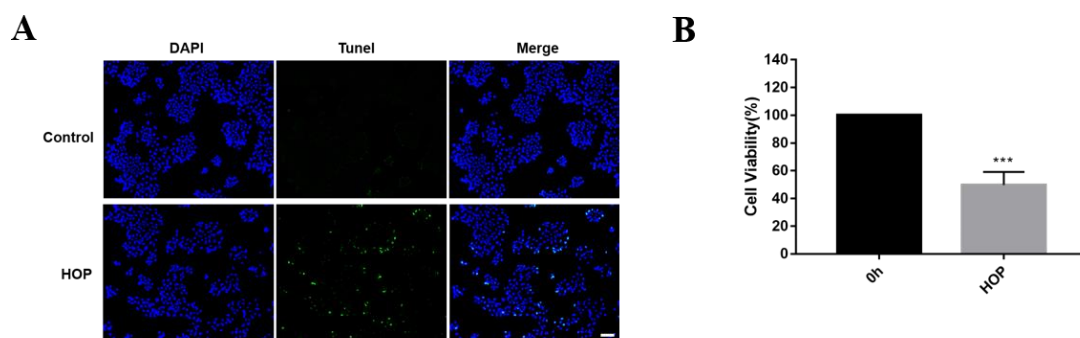**Figure S1. Hyperosmolarity induced cellular apoptosis and death in HCECs. (A)**

Tunel staining images in HCECs exposed to normal or hyperosmotic medium.

Bar=50 $\mu$ m. **(B)** Changes to cell viability of HCECs by CCK8 assay. The results are

shown as mean  $\pm$  SD of three independent experiments. \*\*\*P < 0.001.

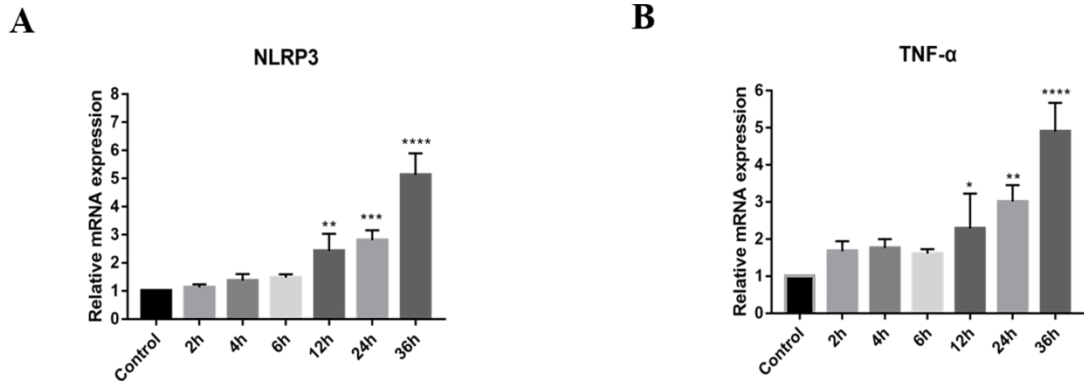

**Figure S2. Hyperosmolarity stimulated inflammatory factors in HCECs. (A)** Gene expression results of NLRP3. **(B)** Gene expression of TNF $\alpha$ . The results are shown as mean  $\pm$  SD of three independent experiments. \*P < 0.05, \*\* P < 0.01, \*\*\*P < 0.001, \*\*\*\*P < 0.0001.

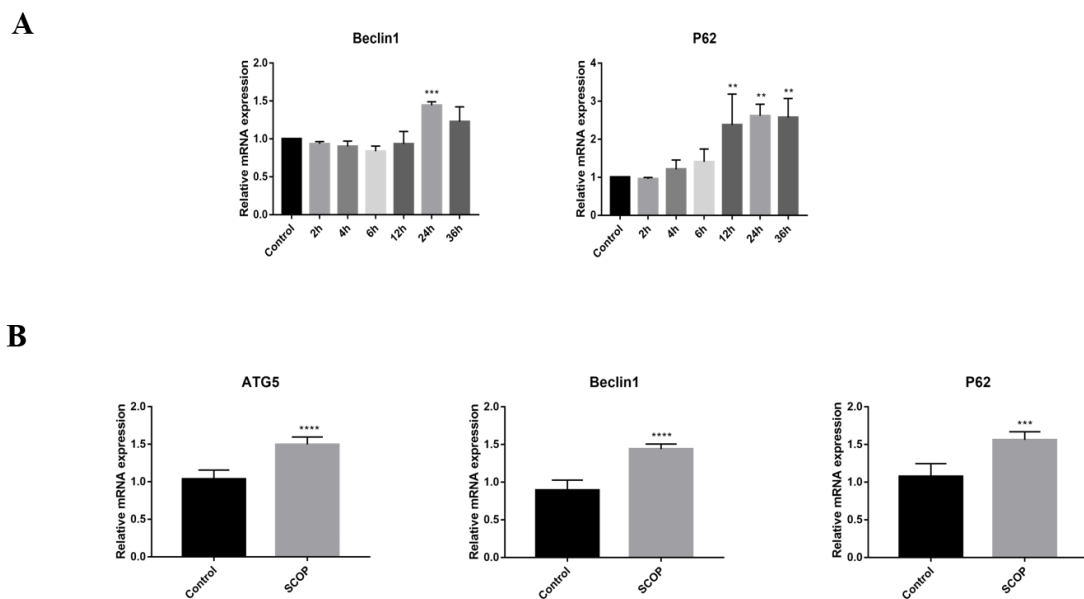

**Figure S3. Expression of autophagy genes in dry eye. (A)** RT-PCR results showing Beclin1 and P62 expression in untreated and HOP-stressed HCECs for indicated times (N=3). **(B)** Gene expression of ATG5, Beclin1 and P62 in normal and dry eye mice (N=5). The results are shown as mean  $\pm$  SD. \*\* P < 0.01, \*\*\*P < 0.001, \*\*\*\*P < 0.0001.

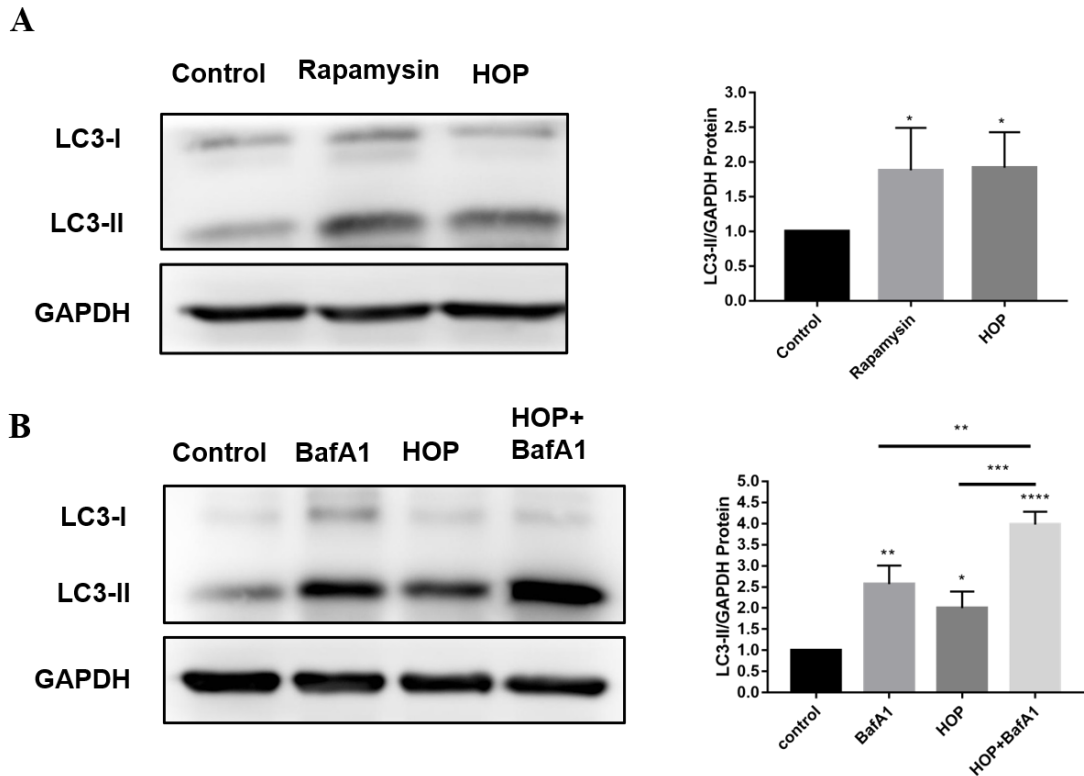

**Figure S4. Hyperosmolarity induced increased autophagy flux in HCECs. (A)**

Western blot assays were performed to detect LC3 expression in HCECs exposed to Rapamycin (1  $\mu$ M) or HOP for 24 hours. **(B)** HCECs were exposed to HOP for 24 hours and then treated or not treated with bafilomycin A1 (100 nM, 4 hours). Changes to LC-3-II expression were detected by Western blot. The results are shown as mean  $\pm$  SD of three or four independent experiments. \* $P < 0.05$ , \*\*  $P < 0.01$ , \*\*\*  $P < 0.001$ , \*\*\*\*  $P < 0.0001$ .

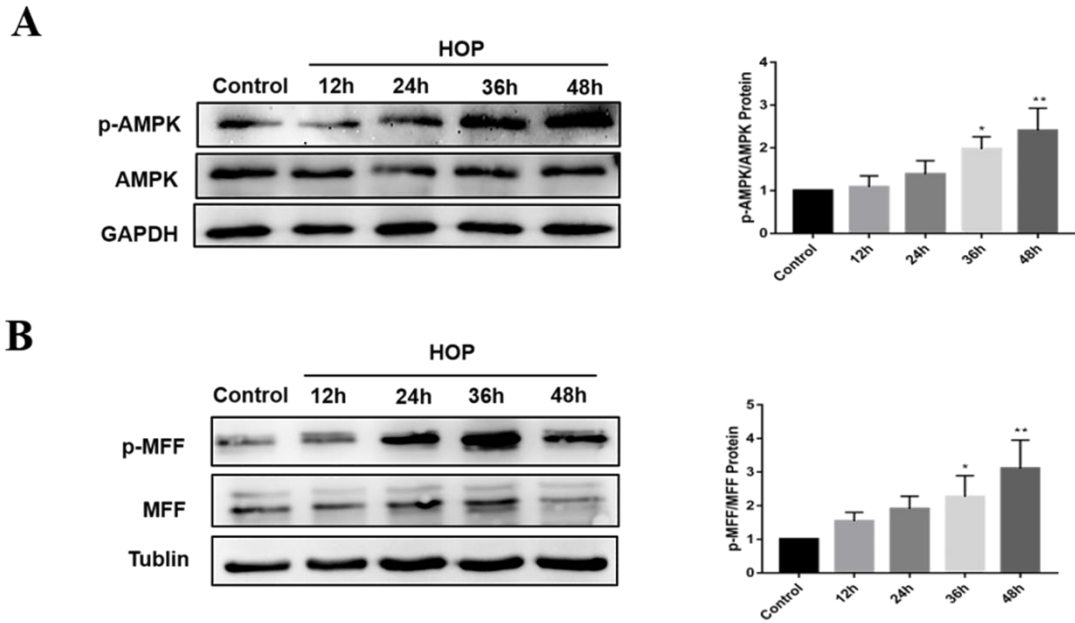

**Figure S5. The AMPK/MFF/DRP1 pathway was activated in HOP-stressed HCECs.**

(A) Western Blot detected AMPK and p-AMPK expression in untreated and HOP-stressed HCECs for indicated times. (B) Western Blot results showing MFF and p-MFF expression in untreated and HOP-stressed HCECs for indicated times. The results are shown as mean  $\pm$  SD of three independent experiments. \* $P < 0.05$ , \*\*  $P < 0.01$ .

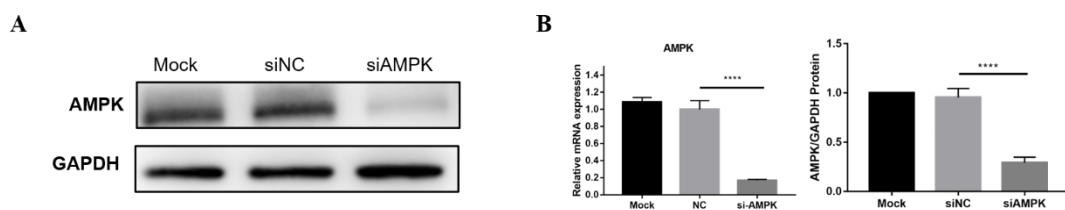

**Figure S6. Validation of AMPK interference efficiency. (A)** Western Blot showed AMPK expression after AMPK-specific siRNAs transfection in HCECs. (B) Quantitative

analysis of the AMPK gene and protein expression after siAMPK transfection in HCECs. The results are shown as mean  $\pm$  SD of three independent experiments. \*\*\*\*

$P < 0.0001$ .
